# Supplementary material
Source: publisher figshare collection journal article supplement (https://f1000.figshare.com/ndownloader/files/2025169)
Supplement: Supplementary file 1 [file 2025169]

## Sheet: overlap_Reactome_upreg
Gene Set Name	# Genes in Gene Set (K)	Description	# Genes in Overlap (k)	k/K	p-value	FDR q-value
REACTOME_METABOLISM_OF_PROTEINS	518	Genes involved in Metabolism of proteins	13	0.0251	3.54e-09	1.28e-06
REACTOME_ASPARAGINE_N_LINKED_GLYCOSYLATION	81	Genes involved in Asparagine N-linked glycosylation	7	0.0864	3.79e-09	1.28e-06
REACTOME_DIABETES_PATHWAYS	133	Genes involved in Diabetes pathways	7	0.0526	1.2e-07	2.04e-05
REACTOME_UNFOLDED_PROTEIN_RESPONSE	80	Genes involved in Unfolded Protein Response	6	0.075	1.21e-07	2.04e-05
REACTOME_IMMUNE_SYSTEM	933	Genes involved in Immune System	14	0.015	5e-07	6.74e-05
REACTOME_POST_TRANSLATIONAL_PROTEIN_MODIFICATION	188	Genes involved in Post-translational protein modification	7	0.0372	1.25e-06	0.00014
REACTOME_CALNEXIN_CALRETICULIN_CYCLE	11	Genes involved in Calnexin/calreticulin cycle	3	0.2727	3.67e-06	0.000354
REACTOME_N_GLYCAN_TRIMMING_IN_THE_ER_AND_CALNEXIN_CALRETICULIN_CYCLE	13	Genes involved in N-glycan trimming in the ER and Calnexin/Calreticulin cycle	3	0.2308	6.34e-06	0.000534
REACTOME_ADAPTIVE_IMMUNE_SYSTEM	539	Genes involved in Adaptive Immune System	9	0.0167	2.62e-05	0.00196
REACTOME_MEMBRANE_TRAFFICKING	129	Genes involved in Membrane Trafficking	5	0.0388	3.61e-05	0.00242
REACTOME_SIGNALLING_BY_NGF	217	Genes involved in Signalling by NGF	6	0.0276	3.96e-05	0.00242
REACTOME_PI3K_CASCADE	71	Genes involved in PI3K Cascade	4	0.0563	5.28e-05	0.00291
REACTOME_ACTIVATION_OF_GENES_BY_ATF4	26	Genes involved in Activation of Genes by ATF4	3	0.1154	5.61e-05	0.00291
REACTOME_SLC_MEDIATED_TRANSMEMBRANE_TRANSPORT	241	Genes involved in SLC-mediated transmembrane transport	6	0.0249	7.07e-05	0.0033
REACTOME_PERK_REGULATED_GENE_EXPRESSION	29	Genes involved in PERK regulated gene expression	3	0.1034	7.83e-05	0.0033
REACTOME_PKB_MEDIATED_EVENTS	29	Genes involved in PKB-mediated events	3	0.1034	7.83e-05	0.0033
REACTOME_CLASS_I_MHC_MEDIATED_ANTIGEN_PROCESSING_PRESENTATION	251	Genes involved in Class I MHC mediated antigen processing & presentation	6	0.0239	8.84e-05	0.0035
REACTOME_INSULIN_RECEPTOR_SIGNALLING_CASCADE	87	Genes involved in Insulin receptor signalling cascade	4	0.046	0.000117	0.00438
REACTOME_TRANSMEMBRANE_TRANSPORT_OF_SMALL_MOLECULES	413	Genes involved in Transmembrane transport of small molecules	7	0.0169	0.000193	0.00685
REACTOME_SIGNALING_BY_INSULIN_RECEPTOR	108	Genes involved in Signaling by Insulin receptor	4	0.037	0.000269	0.00869
Gene/Gene Set Overlap Matrix
Entrez Gene Id	Gene Symbol	Gene Description	REACTOME_METABOLISM_OF_PROTEINS	REACTOME_ASPARAGINE_N_LINKED_GLYCOSYLATION	REACTOME_DIABETES_PATHWAYS	REACTOME_UNFOLDED_PROTEIN_RESPONSE	REACTOME_IMMUNE_SYSTEM	REACTOME_POST_TRANSLATIONAL_PROTEIN_MODIFICATION	REACTOME_CALNEXIN_CALRETICULIN_CYCLE	REACTOME_N_GLYCAN_TRIMMING_IN_THE_ER_AND_CALNEXIN_CALRETICULIN_CYCLE	REACTOME_ADAPTIVE_IMMUNE_SYSTEM	REACTOME_MEMBRANE_TRAFFICKING	REACTOME_SIGNALLING_BY_NGF	REACTOME_PI3K_CASCADE	REACTOME_ACTIVATION_OF_GENES_BY_ATF4	REACTOME_SLC_MEDIATED_TRANSMEMBRANE_TRANSPORT	REACTOME_PERK_REGULATED_GENE_EXPRESSION	REACTOME_PKB_MEDIATED_EVENTS	REACTOME_CLASS_I_MHC_MEDIATED_ANTIGEN_PROCESSING_PRESENTATION	REACTOME_INSULIN_RECEPTOR_SIGNALLING_CASCADE	REACTOME_TRANSMEMBRANE_TRANSPORT_OF_SMALL_MOLECULES	REACTOME_SIGNALING_BY_INSULIN_RECEPTOR
9695	EDEM1	ER degradation enhancer, mannosidase alpha-like 1	REACTOME_METABOLISM_OF_PROTEINS	REACTOME_ASPARAGINE_N_LINKED_GLYCOSYLATION	REACTOME_DIABETES_PATHWAYS	REACTOME_UNFOLDED_PROTEIN_RESPONSE		REACTOME_POST_TRANSLATIONAL_PROTEIN_MODIFICATION	REACTOME_CALNEXIN_CALRETICULIN_CYCLE	REACTOME_N_GLYCAN_TRIMMING_IN_THE_ER_AND_CALNEXIN_CALRETICULIN_CYCLE
2923	PDIA3	protein disulfide isomerase family A, member 3	REACTOME_METABOLISM_OF_PROTEINS	REACTOME_ASPARAGINE_N_LINKED_GLYCOSYLATION			REACTOME_IMMUNE_SYSTEM	REACTOME_POST_TRANSLATIONAL_PROTEIN_MODIFICATION	REACTOME_CALNEXIN_CALRETICULIN_CYCLE	REACTOME_N_GLYCAN_TRIMMING_IN_THE_ER_AND_CALNEXIN_CALRETICULIN_CYCLE	REACTOME_ADAPTIVE_IMMUNE_SYSTEM								REACTOME_CLASS_I_MHC_MEDIATED_ANTIGEN_PROCESSING_PRESENTATION
9871	SEC24D	SEC24 family, member D (S. cerevisiae)	REACTOME_METABOLISM_OF_PROTEINS	REACTOME_ASPARAGINE_N_LINKED_GLYCOSYLATION			REACTOME_IMMUNE_SYSTEM	REACTOME_POST_TRANSLATIONAL_PROTEIN_MODIFICATION			REACTOME_ADAPTIVE_IMMUNE_SYSTEM	REACTOME_MEMBRANE_TRAFFICKING							REACTOME_CLASS_I_MHC_MEDIATED_ANTIGEN_PROCESSING_PRESENTATION
80267	EDEM3	ER degradation enhancer, mannosidase alpha-like 3	REACTOME_METABOLISM_OF_PROTEINS	REACTOME_ASPARAGINE_N_LINKED_GLYCOSYLATION				REACTOME_POST_TRANSLATIONAL_PROTEIN_MODIFICATION	REACTOME_CALNEXIN_CALRETICULIN_CYCLE	REACTOME_N_GLYCAN_TRIMMING_IN_THE_ER_AND_CALNEXIN_CALRETICULIN_CYCLE
6185	RPN2	ribophorin II	REACTOME_METABOLISM_OF_PROTEINS	REACTOME_ASPARAGINE_N_LINKED_GLYCOSYLATION				REACTOME_POST_TRANSLATIONAL_PROTEIN_MODIFICATION
79796	ALG9	asparagine-linked glycosylation 9, alpha-1,2-mannosyltransferase homolog (S. cerevisiae)	REACTOME_METABOLISM_OF_PROTEINS	REACTOME_ASPARAGINE_N_LINKED_GLYCOSYLATION				REACTOME_POST_TRANSLATIONAL_PROTEIN_MODIFICATION
1603	DAD1	defender against cell death 1	REACTOME_METABOLISM_OF_PROTEINS	REACTOME_ASPARAGINE_N_LINKED_GLYCOSYLATION				REACTOME_POST_TRANSLATIONAL_PROTEIN_MODIFICATION
28972	SPCS1	signal peptidase complex subunit 1 homolog (S. cerevisiae)	REACTOME_METABOLISM_OF_PROTEINS		REACTOME_DIABETES_PATHWAYS
10952	SEC61B	Sec61 beta subunit	REACTOME_METABOLISM_OF_PROTEINS				REACTOME_IMMUNE_SYSTEM				REACTOME_ADAPTIVE_IMMUNE_SYSTEM								REACTOME_CLASS_I_MHC_MEDIATED_ANTIGEN_PROCESSING_PRESENTATION
8890	EIF2B4	eukaryotic translation initiation factor 2B, subunit 4 delta, 67kDa	REACTOME_METABOLISM_OF_PROTEINS
9669	EIF5B	eukaryotic translation initiation factor 5B	REACTOME_METABOLISM_OF_PROTEINS
10576	CCT2	chaperonin containing TCP1, subunit 2 (beta)	REACTOME_METABOLISM_OF_PROTEINS
6950	TCP1	t-complex 1	REACTOME_METABOLISM_OF_PROTEINS
1649	DDIT3	DNA-damage-inducible transcript 3			REACTOME_DIABETES_PATHWAYS	REACTOME_UNFOLDED_PROTEIN_RESPONSE									REACTOME_ACTIVATION_OF_GENES_BY_ATF4		REACTOME_PERK_REGULATED_GENE_EXPRESSION
167227	DCP2	DCP2 decapping enzyme homolog (S. cerevisiae)			REACTOME_DIABETES_PATHWAYS	REACTOME_UNFOLDED_PROTEIN_RESPONSE									REACTOME_ACTIVATION_OF_GENES_BY_ATF4		REACTOME_PERK_REGULATED_GENE_EXPRESSION
9709	HERPUD1	homocysteine-inducible, endoplasmic reticulum stress-inducible, ubiquitin-like domain member 1			REACTOME_DIABETES_PATHWAYS	REACTOME_UNFOLDED_PROTEIN_RESPONSE									REACTOME_ACTIVATION_OF_GENES_BY_ATF4		REACTOME_PERK_REGULATED_GENE_EXPRESSION
51360	MBTPS2	membrane-bound transcription factor peptidase, site 2			REACTOME_DIABETES_PATHWAYS	REACTOME_UNFOLDED_PROTEIN_RESPONSE
10525	HYOU1	hypoxia up-regulated 1			REACTOME_DIABETES_PATHWAYS	REACTOME_UNFOLDED_PROTEIN_RESPONSE
1759	DNM1	dynamin 1					REACTOME_IMMUNE_SYSTEM				REACTOME_ADAPTIVE_IMMUNE_SYSTEM	REACTOME_MEMBRANE_TRAFFICKING	REACTOME_SIGNALLING_BY_NGF
7249	TSC2	tuberous sclerosis 2					REACTOME_IMMUNE_SYSTEM				REACTOME_ADAPTIVE_IMMUNE_SYSTEM		REACTOME_SIGNALLING_BY_NGF	REACTOME_PI3K_CASCADE				REACTOME_PKB_MEDIATED_EVENTS		REACTOME_INSULIN_RECEPTOR_SIGNALLING_CASCADE		REACTOME_SIGNALING_BY_INSULIN_RECEPTOR
5721	PSME2	proteasome (prosome, macropain) activator subunit 2 (PA28 beta)					REACTOME_IMMUNE_SYSTEM				REACTOME_ADAPTIVE_IMMUNE_SYSTEM								REACTOME_CLASS_I_MHC_MEDIATED_ANTIGEN_PROCESSING_PRESENTATION
9978	RBX1	ring-box 1, E3 ubiquitin protein ligase					REACTOME_IMMUNE_SYSTEM				REACTOME_ADAPTIVE_IMMUNE_SYSTEM								REACTOME_CLASS_I_MHC_MEDIATED_ANTIGEN_PROCESSING_PRESENTATION
10273	STUB1	STIP1 homology and U-box containing protein 1, E3 ubiquitin protein ligase					REACTOME_IMMUNE_SYSTEM				REACTOME_ADAPTIVE_IMMUNE_SYSTEM								REACTOME_CLASS_I_MHC_MEDIATED_ANTIGEN_PROCESSING_PRESENTATION
1445	CSK	c-src tyrosine kinase					REACTOME_IMMUNE_SYSTEM				REACTOME_ADAPTIVE_IMMUNE_SYSTEM
3667	IRS1	insulin receptor substrate 1					REACTOME_IMMUNE_SYSTEM						REACTOME_SIGNALLING_BY_NGF	REACTOME_PI3K_CASCADE						REACTOME_INSULIN_RECEPTOR_SIGNALLING_CASCADE		REACTOME_SIGNALING_BY_INSULIN_RECEPTOR
3146	HMGB1	high mobility group box 1					REACTOME_IMMUNE_SYSTEM
5094	PCBP2	poly(rC) binding protein 2					REACTOME_IMMUNE_SYSTEM
3326	HSP90AB1	heat shock protein 90kDa alpha (cytosolic), class B member 1					REACTOME_IMMUNE_SYSTEM
3569	IL6	interleukin 6 (interferon, beta 2)					REACTOME_IMMUNE_SYSTEM
51160	VPS28	vacuolar protein sorting 28 homolog (S. cerevisiae)										REACTOME_MEMBRANE_TRAFFICKING
7251	TSG101	tumor susceptibility gene 101										REACTOME_MEMBRANE_TRAFFICKING
2580	GAK	cyclin G associated kinase										REACTOME_MEMBRANE_TRAFFICKING
6610	SMPD2	sphingomyelin phosphodiesterase 2, neutral membrane (neutral sphingomyelinase)											REACTOME_SIGNALLING_BY_NGF
10018	BCL2L11	BCL2-like 11 (apoptosis facilitator)											REACTOME_SIGNALLING_BY_NGF
3065	HDAC1	histone deacetylase 1											REACTOME_SIGNALLING_BY_NGF
5562	PRKAA1	protein kinase, AMP-activated, alpha 1 catalytic subunit												REACTOME_PI3K_CASCADE				REACTOME_PKB_MEDIATED_EVENTS		REACTOME_INSULIN_RECEPTOR_SIGNALLING_CASCADE		REACTOME_SIGNALING_BY_INSULIN_RECEPTOR
29904	EEF2K	eukaryotic elongation factor-2 kinase												REACTOME_PI3K_CASCADE				REACTOME_PKB_MEDIATED_EVENTS		REACTOME_INSULIN_RECEPTOR_SIGNALLING_CASCADE		REACTOME_SIGNALING_BY_INSULIN_RECEPTOR
6566	SLC16A1	solute carrier family 16, member 1 (monocarboxylic acid transporter 1)														REACTOME_SLC_MEDIATED_TRANSMEMBRANE_TRANSPORT					REACTOME_TRANSMEMBRANE_TRANSPORT_OF_SMALL_MOLECULES
7922	SLC39A7	solute carrier family 39 (zinc transporter), member 7														REACTOME_SLC_MEDIATED_TRANSMEMBRANE_TRANSPORT					REACTOME_TRANSMEMBRANE_TRANSPORT_OF_SMALL_MOLECULES
81031	SLC2A10	solute carrier family 2 (facilitated glucose transporter), member 10														REACTOME_SLC_MEDIATED_TRANSMEMBRANE_TRANSPORT					REACTOME_TRANSMEMBRANE_TRANSPORT_OF_SMALL_MOLECULES
54407	SLC38A2	solute carrier family 38, member 2														REACTOME_SLC_MEDIATED_TRANSMEMBRANE_TRANSPORT					REACTOME_TRANSMEMBRANE_TRANSPORT_OF_SMALL_MOLECULES
6558	SLC12A2	solute carrier family 12 (sodium/potassium/chloride transporters), member 2														REACTOME_SLC_MEDIATED_TRANSMEMBRANE_TRANSPORT					REACTOME_TRANSMEMBRANE_TRANSPORT_OF_SMALL_MOLECULES
9197	SLC33A1	solute carrier family 33 (acetyl-CoA transporter), member 1														REACTOME_SLC_MEDIATED_TRANSMEMBRANE_TRANSPORT					REACTOME_TRANSMEMBRANE_TRANSPORT_OF_SMALL_MOLECULES
23456	ABCB10	ATP-binding cassette, sub-family B (MDR/TAP), member 10																			REACTOME_TRANSMEMBRANE_TRANSPORT_OF_SMALL_MOLECULES
10087	COL4A3BP	collagen, type IV, alpha 3 (Goodpasture antigen) binding protein
5007	OSBP	oxysterol binding protein
23171	GPD1L	glycerol-3-phosphate dehydrogenase 1-like
1119	CHKA	choline kinase alpha
1737	DLAT	dihydrolipoamide S-acetyltransferase
6392	SDHD	succinate dehydrogenase complex, subunit D, integral membrane protein
1499	CTNNB1	catenin (cadherin-associated protein), beta 1, 88kDa
64689	GORASP1	golgi reassembly stacking protein 1, 65kDa
203068	TUBB	tubulin, beta class I
7329	UBE2I	ubiquitin-conjugating enzyme E2I
8467	SMARCA5	SWI/SNF related, matrix associated, actin dependent regulator of chromatin, subfamily a, member 5
5034	P4HB	prolyl 4-hydroxylase, beta polypeptide
9101	USP8	ubiquitin specific peptidase 8
3020	H3F3A	H3 histone, family 3A
5868	RAB5A	RAB5A, member RAS oncogene family
10919	EHMT2	euchromatic histone-lysine N-methyltransferase 2
9901	SRGAP3	SLIT-ROBO Rho GTPase activating protein 3
26275	HIBCH	3-hydroxyisobutyryl-CoA hydrolase
8675	STX16	syntaxin 16
2990	GUSB	glucuronidase, beta
10072	DPP3	dipeptidyl-peptidase 3
10094	ARPC3	actin related protein 2/3 complex, subunit 3, 21kDa
10363	HMG20A	high mobility group 20A
10488	CREB3	cAMP responsive element binding protein 3
10492	SYNCRIP	synaptotagmin binding, cytoplasmic RNA interacting protein
10802	SEC24A	SEC24 family, member A (S. cerevisiae)
10869	USP19	ubiquitin specific peptidase 19
10935	PRDX3	peroxiredoxin 3
10987	COPS5	COP9 constitutive photomorphogenic homolog subunit 5 (Arabidopsis)
11018	TMED1	transmembrane emp24 protein transport domain containing 1
11236	RNF139	ring finger protein 139
11315	PARK7	parkinson protein 7
126133	ALDH16A1	aldehyde dehydrogenase 16 family, member A1
1842	ECM2	extracellular matrix protein 2, female organ and adipocyte specific
196051	PPAPDC1A	phosphatidic acid phosphatase type 2 domain containing 1A
202052	DNAJC18	DnaJ (Hsp40) homolog, subfamily C, member 18
22824	HSPA4L	heat shock 70kDa protein 4-like
22887	FOXJ3	forkhead box J3
22982	DIP2C	DIP2 disco-interacting protein 2 homolog C (Drosophila)
23011	RAB21	RAB21, member RAS oncogene family
23181	DIP2A	DIP2 disco-interacting protein 2 homolog A (Drosophila)
23357	ANGEL1	angel homolog 1 (Drosophila)
23411	SIRT1	sirtuin 1
26003	GORASP2	golgi reassembly stacking protein 2, 55kDa
26052	DNM3	dynamin 3
26286	ARFGAP3	ADP-ribosylation factor GTPase activating protein 3
27072	VPS41	vacuolar protein sorting 41 homolog (S. cerevisiae)
2971	GTF3A	general transcription factor IIIA
29800	ZDHHC1	zinc finger, DHHC-type containing 1
3337	DNAJB1	DnaJ (Hsp40) homolog, subfamily B, member 1
3338	DNAJC4	DnaJ (Hsp40) homolog, subfamily C, member 4
373	TRIM23	tripartite motif containing 23
378	ARF4	ADP-ribosylation factor 4
400	ARL1	ADP-ribosylation factor-like 1
401548	SNX30	sorting nexin family member 30
4170	MCL1	myeloid cell leukemia sequence 1 (BCL2-related)
4675	NAP1L3	nucleosome assembly protein 1-like 3
5052	PRDX1	peroxiredoxin 1
50999	TMED5	transmembrane emp24 protein transport domain containing 5
51375	SNX7	sorting nexin 7
54904	WHSC1L1	Wolf-Hirschhorn syndrome candidate 1-like 1
55161	TMEM33	transmembrane protein 33
55275	VPS53	vacuolar protein sorting 53 homolog (S. cerevisiae)
55968	NSFL1C	NSFL1 (p97) cofactor (p47)
55973	BCAP29	B-cell receptor-associated protein 29
57511	COG6	component of oligomeric golgi complex 6
57567	ZNF319	zinc finger protein 319
57634	EP400	E1A binding protein p400
5869	RAB5B	RAB5B, member RAS oncogene family
59286	UBL5	ubiquitin-like 5
59349	KLHL12	kelch-like 12 (Drosophila)
6048	RNF5	ring finger protein 5
60681	FKBP10	FK506 binding protein 10, 65 kDa
6238	RRBP1	ribosome binding protein 1 homolog 180kDa (dog)
64083	GOLPH3	golgi phosphoprotein 3 (coat-protein)
64121	RRAGC	Ras-related GTP binding C
6447	SCG5	secretogranin V (7B2 protein)
6717	SRI	sorcin
6839	SUV39H1	suppressor of variegation 3-9 homolog 1 (Drosophila)
7001	PRDX2	peroxiredoxin 2
79139	DERL1	Der1-like domain family, member 1
80124	VCPIP1	valosin containing protein (p97)/p47 complex interacting protein 1
81631	MAP1LC3B	microtubule-associated protein 1 light chain 3 beta
83939	EIF2A	eukaryotic translation initiation factor 2A, 65kDa
84557	MAP1LC3A	microtubule-associated protein 1 light chain 3 alpha
94101	ORMDL1	ORM1-like 1 (S. cerevisiae)
9943	OXSR1	oxidative-stress responsive 1
